# Supplementary material for: 2D and 3D networks of lanthanide with mixed dicarboxylate ligands: syntheses, crystal structures and photoluminescent properties
Source: Royal Society of Chemistry journal article supplement (doi:10.1039/b900522f), 2009-01-01
Supplement: b900522f.pdf [file b900522f.pdf]

## Two- and Three-Dimensional Networks of Lanthanide with Mixed Dicarboxylate Ligands: Syntheses, Crystal Structures and Photoluminescent Properties

Qing-Feng Yang,<sup>a</sup> Yang Yu,<sup>a</sup> Tian-You Song,<sup>a</sup> Jie-Hui Yu,<sup>a</sup> Xiao Zhang,<sup>b</sup> Ji-Qing Xu<sup>\*a</sup> and  
Tie-Gang Wang<sup>a</sup>

<sup>a</sup> College of Chemistry and State Key Laboratory of Inorganic Synthesis and Preparative Chemistry, Jilin University, Changchun, Jilin, 130021, China. Fax: +86-431-85168624; Tel: +86-431-88499132; E-mail: xjq@mail.jlu.edu.cn

<sup>b</sup> Academy of Fundamental and Interdisciplinary Sciences, Harbin Institute Technology, Harbin, Heilongjiang, 150080, China.

Table. S1 Selected bond lengths (Å) for **1-10**.

| <b>1</b>     |            |              |            |              |            |
|--------------|------------|--------------|------------|--------------|------------|
| Ce(1)–O(1)   | 2.4771(16) | Ce(1)–O(3)#4 | 2.5677(15) | Ce(1)–O(6)#3 | 2.5268(15) |
| Ce(1)–O(1)#1 | 2.6573(13) | Ce(1)–O(4)#4 | 2.5474(15) | Ce(1)–O(7)   | 2.4772(16) |
| Ce(1)–O(2)#1 | 2.5660(14) | Ce(1)–O(5)   | 2.5008(16) | Ce(1)–O(8)   | 2.5070(15) |
| <b>2</b>     |            |              |            |              |            |
| Pr(1)–O(1)   | 2.516(2)   | Pr(1)–O(4)#1 | 2.633(2)   | Pr(1)–O(6)#2 | 2.481(2)   |
| Pr(1)–O(2)   | 2.546(2)   | Pr(1)–O(4)#4 | 2.459(2)   | Pr(1)–O(7)   | 2.489(3)   |
| Pr(1)–O(3)#1 | 2.543(2)   | Pr(1)–O(5)   | 2.506(2)   | Pr(1)–O(8)   | 2.465(3)   |
| <b>3</b>     |            |              |            |              |            |
| Nd(1)–O(1)   | 2.5252(19) | Nd(1)–O(4)#1 | 2.615(2)   | Nd(1)–O(6)#2 | 2.493(2)   |
| Nd(1)–O(2)   | 2.503(2)   | Nd(1)–O(4)#3 | 2.443(2)   | Nd(1)–O(7)   | 2.439(2)   |
| Nd(1)–O(3)#1 | 2.5249(19) | Nd(1)–O(5)   | 2.464(2)   | Nd(1)–O(8)   | 2.465(2)   |
| <b>4</b>     |            |              |            |              |            |
| Sm(1)–O(1)   | 2.492(3)   | Sm(1)–O(3)#1 | 2.496(3)   | Sm(1)–O(6)#2 | 2.470(3)   |
| Sm(1)–O(2)   | 2.612(3)   | Sm(1)–O(4)#1 | 2.479(3)   | Sm(1)–O(7)   | 2.413(3)   |
| Sm(1)–O(2)#3 | 2.417(3)   | Sm(1)–O(5)   | 2.441(3)   | Sm(1)–O(8)   | 2.439(4)   |
| <b>5</b>     |            |              |            |              |            |
| Eu(1)–O(1)   | 2.487(4)   | Eu(1)–O(3)#1 | 2.480(4)   | Eu(1)–O(6)#2 | 2.457(4)   |
| Eu(1)–O(2)   | 2.599(4)   | Eu(1)–O(4)#1 | 2.463(4)   | Eu(1)–O(7)   | 2.401(4)   |
| Eu(1)–O(2)#3 | 2.409(4)   | Eu(1)–O(5)   | 2.432(4)   | Eu(1)–O(8)   | 2.432(4)   |
| <b>6</b>     |            |              |            |              |            |
| Gd(1)–O(1)   | 2.471(3)   | Gd(1)–O(4)   | 2.423(3)   | Gd(1)–O(7)   | 2.592(3)   |
| Gd(1)–O(2)#1 | 2.456(3)   | Gd(1)–O(5)#2 | 2.451(3)   | Gd(1)–O(7)#3 | 2.391(3)   |
| Gd(1)–O(3)#1 | 2.471(3)   | Gd(1)–O(6)   | 2.385(3)   | Gd(1)–O(8)   | 2.408(3)   |
| <b>7</b>     |            |              |            |              |            |
| Tb(1)–O(2)   | 2.366(3)   | Tb(1)–O(8)   | 2.397(4)   | K(1)–O(6)    | 2.932(4)   |
| Tb(1)–O(3)   | 2.388(4)   | Tb(1)–O(9)   | 2.372(4)   | K(1)–O(7)#5  | 2.718(4)   |

|              |          |             |          |             |          |
|--------------|----------|-------------|----------|-------------|----------|
| Tb(1)–O(4)#9 | 2.366(3) | K(1)–O(1)#2 | 3.079(4) | K(1)–O(8)   | 2.865(4) |
| Tb(1)–O(5)   | 2.406(3) | K(1)–O(2)   | 3.092(4) | K(1)–O(9)#5 | 2.985(4) |
| Tb(1)–O(6)   | 2.429(3) | K(1)–O(2)#2 | 3.057(4) |             |          |
| Tb(1)–O(7)   | 2.359(3) | K(1)–O(3)#5 | 3.112(4) |             |          |

**8**

|              |          |             |          |             |          |
|--------------|----------|-------------|----------|-------------|----------|
| Dy(1)–O(2)   | 2.356(3) | Dy(1)–O(8)  | 2.383(3) | K(1)–O(6)   | 2.930(3) |
| Dy(1)–O(3)   | 2.382(3) | Dy(1)–O(9)  | 2.359(3) | K(1)–O(7)#5 | 2.713(3) |
| Dy(1)–O(4)#8 | 2.350(3) | K(1)–O(1)#2 | 3.079(4) | K(1)–O(8)   | 2.864(4) |
| Dy(1)–O(5)   | 2.396(3) | K(1)–O(2)   | 3.082(4) | K(1)–O(9)#5 | 2.972(4) |
| Dy(1)–O(6)   | 2.424(3) | K(1)–O(2)#2 | 3.059(3) |             |          |
| Dy(1)–O(7)   | 2.336(3) | K(1)–O(3)#5 | 3.092(4) |             |          |

**9**

|               |          |              |          |              |          |
|---------------|----------|--------------|----------|--------------|----------|
| Ce(1)–O(1)    | 2.395(3) | Ce(2)–O(3)#6 | 2.362(3) | Ce(2)–O(14)  | 2.540(3) |
| Ce(1)–O(2)#5  | 2.472(3) | Ce(2)–O(4)#7 | 2.451(3) | K(1)–O(2)#5  | 2.655(3) |
| Ce(1)–O(7)#1  | 2.505(3) | Ce(2)–O(5)   | 2.472(3) | K(1)–O(6)#8  | 2.698(3) |
| Ce(1)–O(10)   | 2.499(3) | Ce(2)–O(7)#1 | 2.771(3) | K(1)–O(14)#2 | 2.906(3) |
| Ce(1)–O(11)#3 | 2.424(3) | Ce(2)–O(8)#1 | 2.583(3) | K(1)–O(1W)   | 2.806(3) |
| Ce(1)–O(12)#4 | 2.441(3) | Ce(2)–O(9)   | 2.616(3) | K(1)–O(2W)   | 2.761(4) |
| Ce(1)–O(13)   | 2.656(3) | Ce(2)–O(10)  | 2.686(3) | K(1)–O(3W)   | 2.632(4) |
| Ce(1)–O(1W)   | 2.577(3) | Ce(2)–O(13)  | 2.626(3) |              |          |

**10**

|                |          |              |          |               |          |
|----------------|----------|--------------|----------|---------------|----------|
| Pr(1)–O(2)     | 2.474(3) | Pr(2)–O(1)   | 2.520(3) | Pr(2)–O(14)#2 | 2.560(3) |
| Pr(1)–O(7)     | 2.489(3) | Pr(2)–O(2)   | 2.787(4) | K(1)–O(4)#3   | 2.436(4) |
| Pr(1)–O(9)#3   | 2.465(3) | Pr(2)–O(3)#5 | 2.484(4) | K(1)–O(9)#3   | 2.397(4) |
| Pr(1)–O(10)#7  | 2.400(3) | Pr(2)–O(5)   | 2.434(3) | K(1)–O(13)#2  | 2.861(4) |
| Pr(1)–O(11)#8  | 2.431(3) | Pr(2)–O(6)#6 | 2.326(3) | K(1)–O(15)    | 2.561(4) |
| Pr(1)–O(12)#10 | 2.395(3) | Pr(2)–O(7)   | 2.663(3) | K(1)–O(16)    | 2.414(4) |
| Pr(1)–O(14)#2  | 2.692(3) | Pr(2)–O(8)   | 2.579(3) | K(1)–O(17)    | 2.395(4) |
| Pr(1)–O(15)    | 2.580(3) | Pr(2)–O(13)  | 2.498(3) |               |          |

Symmetry codes:

**1** #1  $-x + 1/2, -y - 1/2, -z + 1$ ; #3  $-x + 1, -y - 1, -z + 1$ ; #4  $x, y - 1, z$ ;

**2** #1  $-x + 1/2, -y + 3/2, -z + 1$ ; #2  $-x, -y + 1, -z + 1$ ; #4  $x, y - 1, z$ ;

**3** #1  $-x + 1/2, -y + 3/2, -z + 2$ ; #2  $-x, -y + 2, -z + 2$ ; #3  $x, y + 1, z$ ;

**4** #1  $-x + 1/2, -y - 1/2, -z + 1$ ; #2  $-x, -y, -z + 1$ ; #3  $-x + 1/2, -y + 1/2, -z + 1$ ;

**5** #1  $-x + 1/2, -y + 3/2, -z + 1$ ; #2  $-x, -y + 1, -z + 1$ ; #3  $-x + 1/2, -y + 1/2, -z + 1$ ;

**6** #1  $-x + 3/2, -y + 1/2, -z$ ; #2  $-x + 1, -y + 1, -z$ ; #3  $-x + 3/2, -y + 3/2, -z$ ;

**7** #2  $-x + 1, -y + 1, -z$ ; #5  $x, y + 1, z$ ; #9  $x - 1, y, z$ ;

**8** #2  $-x + 1, -y + 1, -z + 2$ ; #5  $x, y - 1, z$ ; #8  $x + 1, y, z$ ;

**9** #1  $-x + 2, -y + 2, -z + 2$ ; #2  $-x + 1, -y + 1, -z + 2$ ; #3  $x + 1, y, z$ ; #4  $-x, -y + 1, -z + 1$ ; #5  $-x + 1, -y + 1, -z + 1$ ; #6  $x, y, z + 1$ ; #7  $-x + 1, -y + 2, -z + 1$ ; #8  $-x + 2, -y + 1, -z + 2$ ;

**10** #2  $-x, -y + 2, -z + 1$ ; #3  $x, y + 1, z$ ; #5  $-x + 1, -y + 1, -z + 1$ ; #6  $-x, -y + 1, -z + 1$ ; #7  $-x + 1, -y + 1, -z$ ; #8  $-x, -y + 2, -z$ ; #10  $x + 1, y, z$ .

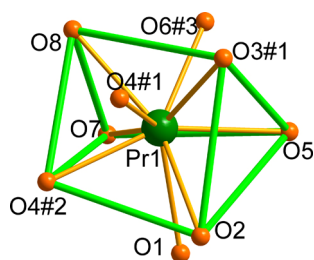

Fig. S1 The distorted tricapped trigonal prism coordination polyhedron of Pr(III) ion in **2**.

Symmetry code: #1,  $0.5 - x, 1.5 - y, 1 - z$ ; #2,  $x, -1 + y, z$ ; #3,  $-x, 1 - y, 1 - z$ .

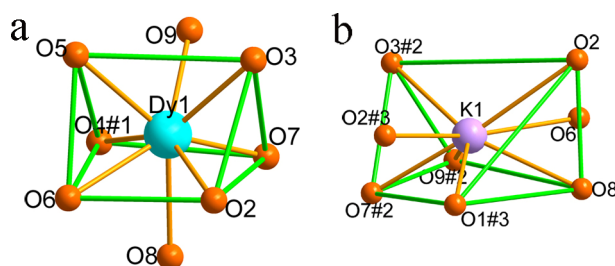

Fig. S2 The distorted bicapped trigonal prism coordination polyhedra of Dy(III) ion (a) and  $K^+$  (b)

in **8**. Symmetry code: #1,  $1 + x, y, z$ ; #2,  $x, -1 + y, z$ .

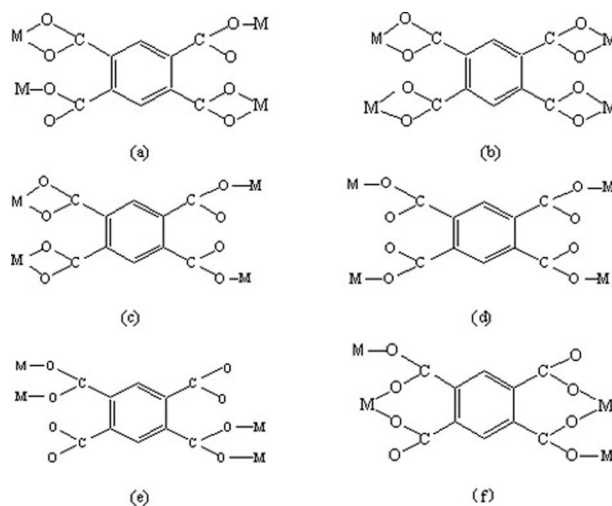

Fig. S3  $\mu_4$  coordination modes of pma ligand in transition metal and lanthanide complexes (a-e being in reported complexes and f in compounds **7** and **8**).

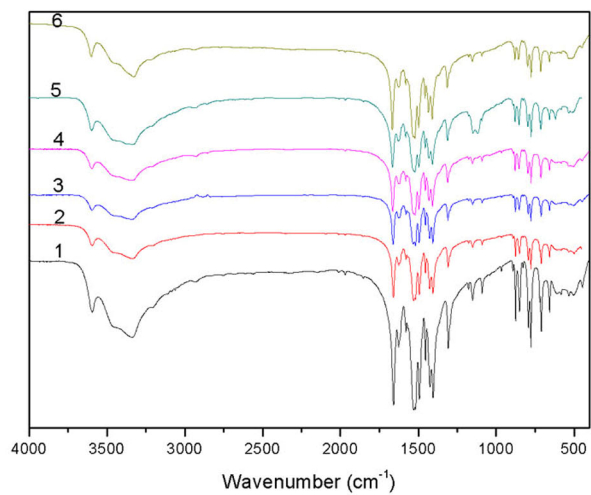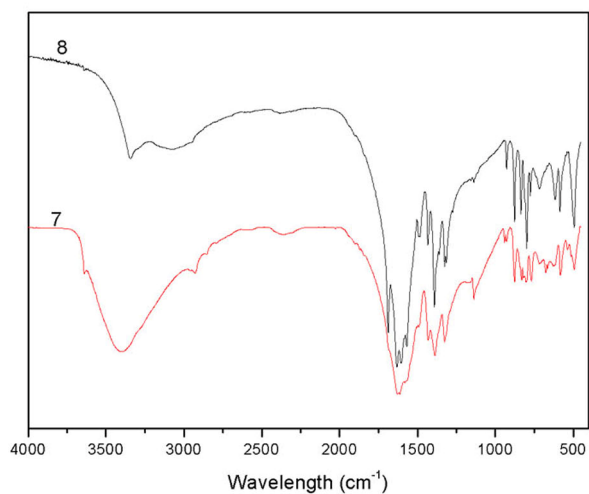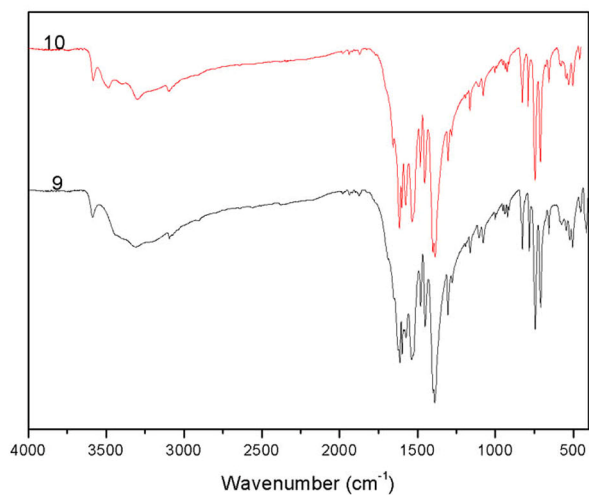

Fig. S4 The IR spectra of complexes 1-10.
